# Supplementary material
Source: Springer Nature journal article supplement (https://www.springermedizin.de/resource/supplementary/12889_2011_3354_MOESM4_ESM.pdf/9488892)
Supplement: MOESM4 [file 9488892]

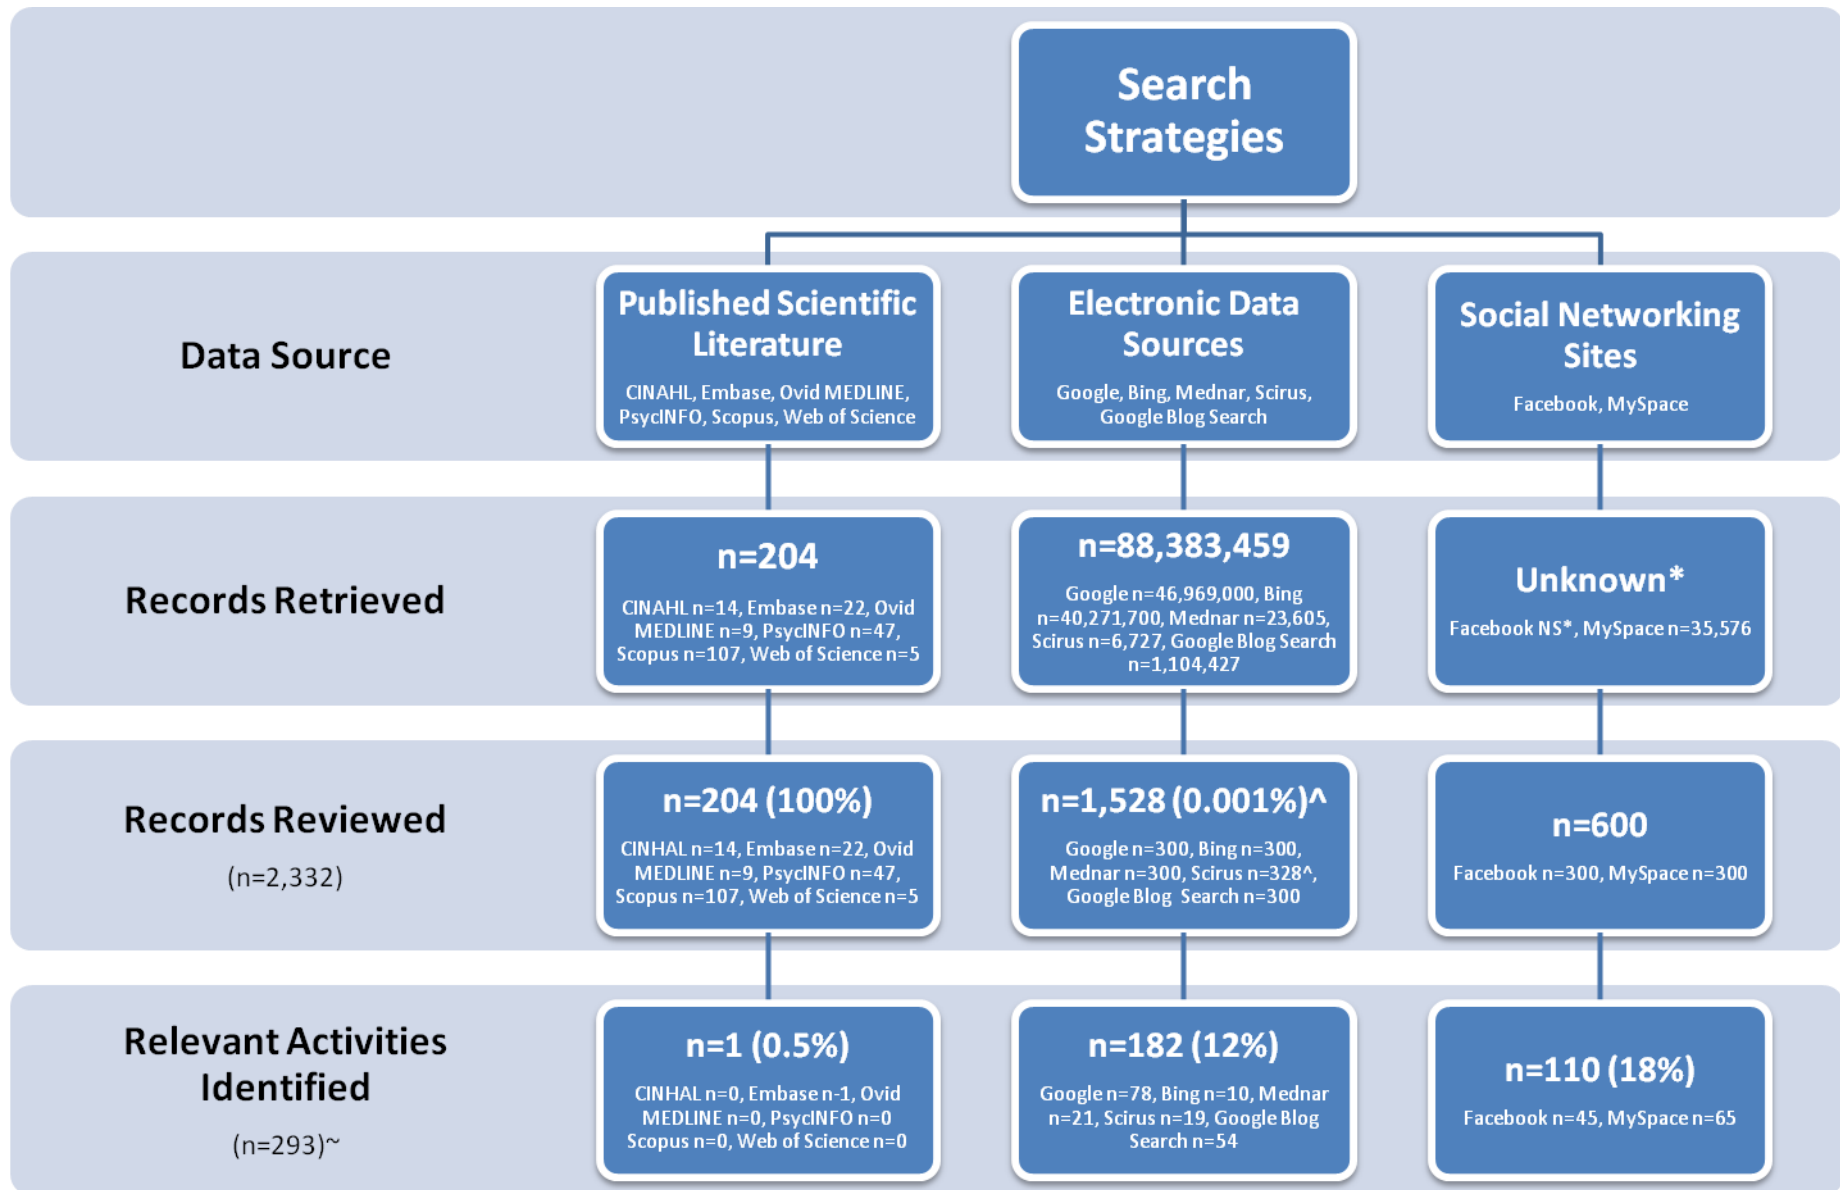

\* Facebook does not supply total number of records found in a search, thus the total number of records retrieved from the searches in social networking sites is not available

^ The first one hundred results for each search term in each electronic search were reviewed. For Scirus, all 28 results in the 'Preferred web source' category were reviewed, in addition to the first 100 results retrieved for each search term in the 'Other Web Sources' category

~ This includes duplicate activities identified multiple times across the search strategies. Removing duplicates results in n=178 unique health promotion activities identified
